# Supplementary material for: Continuous Affinity Purification of Adeno-Associated Virus Using Periodic Counter-Current Chromatography
Source: MDPI journal article supplement (doi:10.3390/pharmaceutics14071346), 2022-06-25
Supplement: s1 [file s1]

## CONTINUOUS AFFINITY PURIFICATION OF ADENO-ASSOCIATED VIRUS USING PERIODIC COUNTER-CURRENT CHROMATOGRAPHY

João P. Mendes<sup>1,2</sup>, Magnus Bergman<sup>3</sup>, Anita Solbrand<sup>3</sup>, Cristina Peixoto<sup>1,2</sup>,  
Manuel J. T. Carrondo<sup>1,2</sup> and Ricardo J. S. Silva<sup>1,2,\*</sup>

<sup>1</sup>iBET, Instituto de Biologia Experimental e Tecnológica, Apartado 12, 2780-901 Oeiras, Portugal

<sup>2</sup>ITQB NOVA, Instituto de Tecnologia Química e Biológica António Xavier, Universidade Nova de Lisboa, Av. da República, 2780-157 Oeiras, Portugal

<sup>3</sup>Cytiva, 751 84 Uppsala, Sweden

**Supplementary Table S1:** Experimental matrix used in the design of experiments reported in Figure 2A.

| Exp No. | Exp Name | Run Order | [NaCl] mM | [Arginine] mM |
|---------|----------|-----------|-----------|---------------|
| 1       | N1       | 2         | 0         | 0             |
| 2       | N2       | 6         | 500       | 0             |
| 3       | N3       | 1         | 0         | 500           |
| 4       | N4       | 4         | 500       | 500           |
| 5       | N5       | 3         | 250       | 250           |
| 6       | N6       | 5         | 250       | 250           |
| 7       | N7       | 7         | 250       | 250           |

**Supplementary Figure S1**

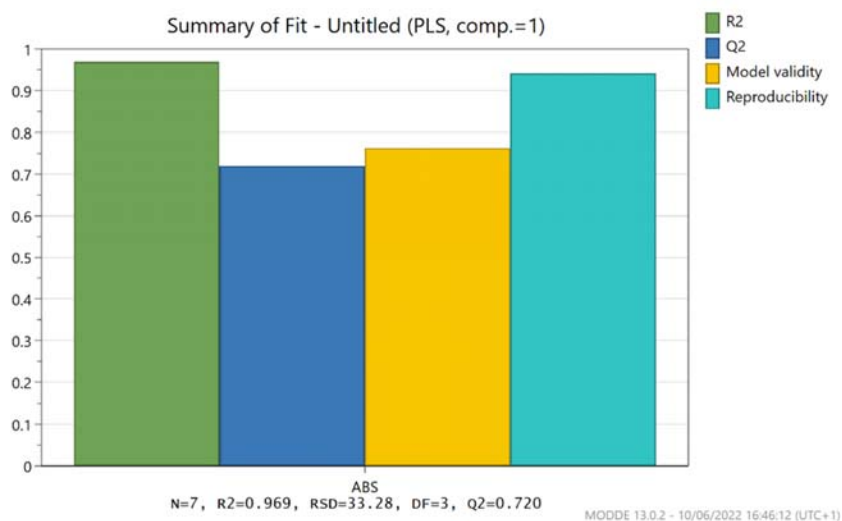

**Supplementary Figure S1:** Summary of fit from DoE reported in Figure 2.

## Supplementary Figure S2

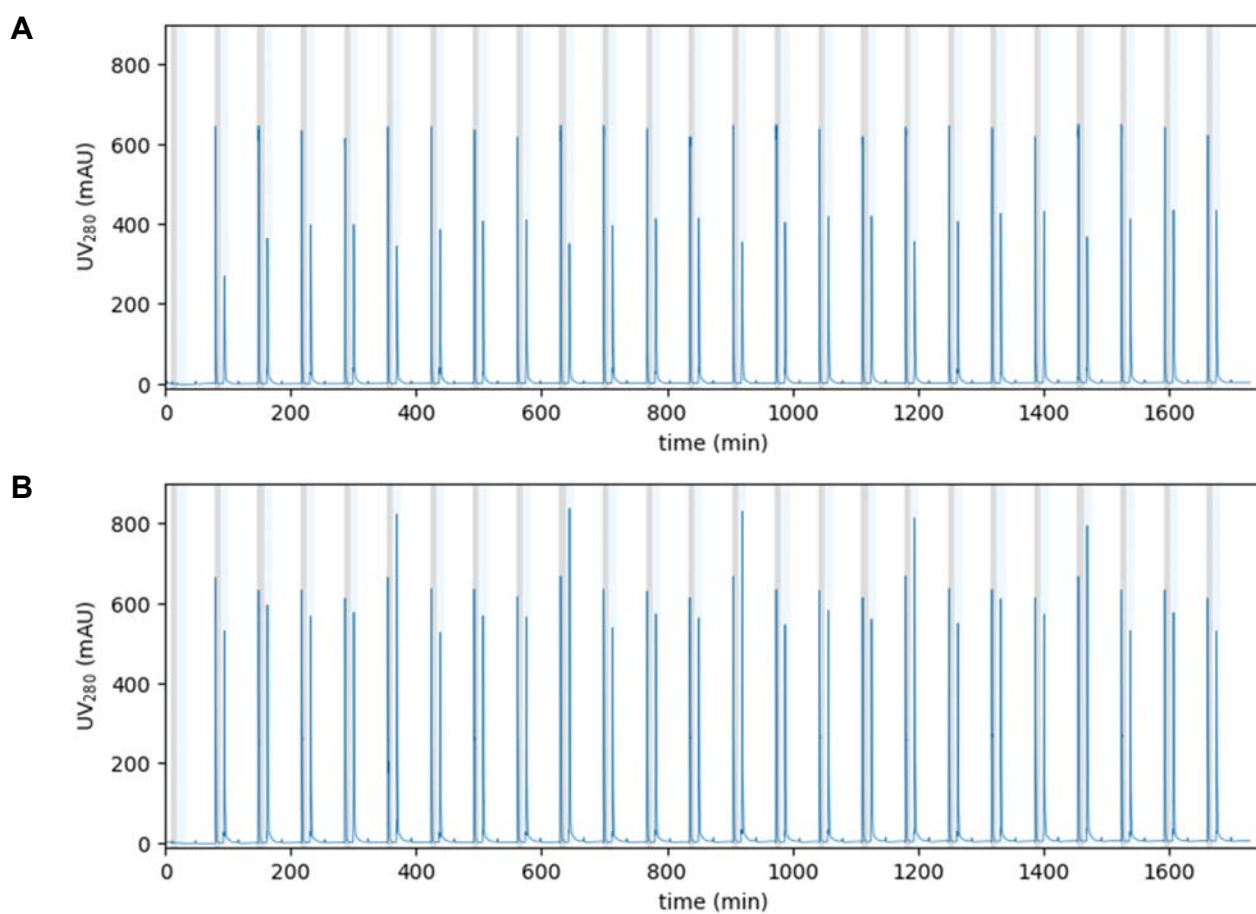

**Supplementary Figure S2:** Chromatograms of PCC runs 1 (A) and 2 (B); UV280 profiles obtained at the outlet of the elution zone over the 6 cycles performed in each run; gray zone marks column wash and light blue elution.

### Supplementary Figure S3

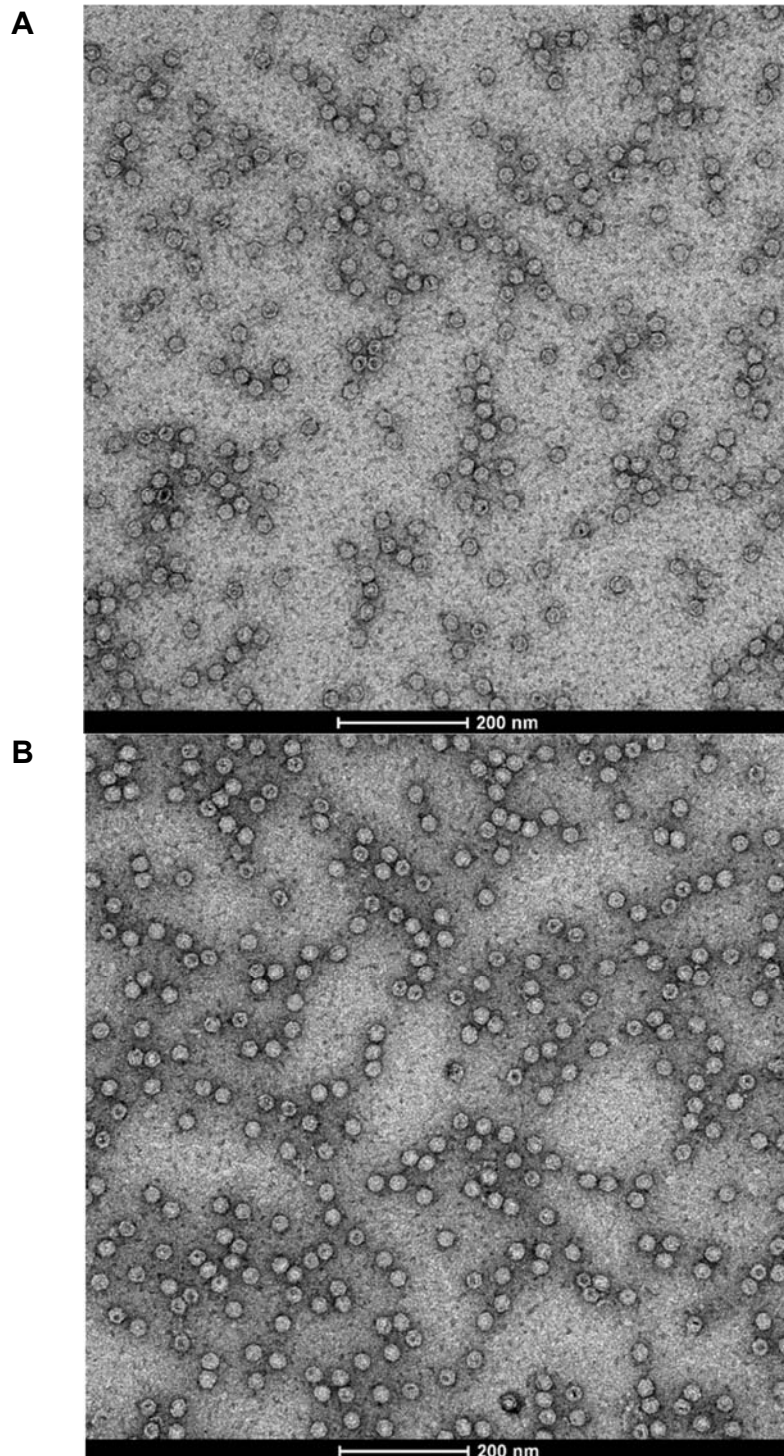

**Supplementary Figure S3:** Uncropped Transmission Electron Microscopy pictures. The figures were used for building Figures 6A and 6B (A and B respectively).
